# Supplementary material
Source: PubMed Central journal article supplement (PMC2933038)
Supplement: NIHMS231166-supplement-Table_S4.pdf [file NIHMS231166-supplement-Table_S4.pdf]

**Table S4****QRT-PCR validation of the effect of hydrocortisone on gene expression in normal versus keloid fibroblasts.**

| <b>Gene symbol</b> | <b>Normal Control/Normal Control (range) n=4</b> | <b>Normal Hydrocortisone/Normal Control (range) n=3</b> | <b>Keloid Control /Keloid Control (range) n=4</b> | <b>Keloid Hydrocortisone/ Keloid Control (range) n=4</b> |
|--------------------|--------------------------------------------------|---------------------------------------------------------|---------------------------------------------------|----------------------------------------------------------|
| CDKN3              | 1.00 (0.65-1.55)                                 | 1.46 (1.00-2.13)                                        | 1.00 (0.57-1.77)                                  | 1.07 (0.64-1.78)                                         |
| COL1A1             | 1.00 (0.75-1.34)                                 | 0.80 (0.63-1.03)                                        | 1.00 (0.70-1.44)                                  | 0.69 (0.40-1.18)                                         |
| CTGF               | 1.00 (0.61-1.64)                                 | 0.22 (0.15-0.31)                                        | 1.00 (0.48-2.10)                                  | 1.03 (0.56-1.90)                                         |
| DKK1               | 1.00 (0.78-1.29)                                 | 1.33 (1.16--1.52)                                       | 1.00 (0.51-1.97)                                  | 2.42 (1.03-5.69)                                         |
| DKK3               | 1.00 (0.56-1.80)                                 | 0.28 (0.18-0.46)                                        | 1.00 (0.45-2.24)                                  | 0.80 (0.35-1.82)                                         |
| DLG7               | 1.00 (0.67-1.49)                                 | 1.31 (0.82-2.08)                                        | 1.00 (0.54-1.86)                                  | 1.32 (0.64-2.73)                                         |
| DPT                | 1.00 (0.56-1.79)                                 | 2.41 (1.42-4.09)                                        | 1.00 (0.12-8.44)                                  | 1.33 (0.52-3.39)                                         |
| ELN                | 1.00 (0.45-2.23)                                 | 0.28 (0.19-0.43)                                        | 1.00 (0.57-1.76)                                  | 1.30 (0.45-3.74)                                         |
| F2R                | 1.00 (0.74-1.35)                                 | 1.08 (0.30-3.91)                                        | 1.00 (0.54-1.86)                                  | 0.38 (0.04-3.30)                                         |
| FZD4               | 1.00 (0.66-1.50)                                 | 2.57 (0.36-18.56)                                       | 1.00 (0.71-1.40)                                  | 1.11 (0.39-3.20)                                         |
| IGFBP2             | 1.00 (0.54-1.84)                                 | 8.48 (6.55-10.97)                                       | 1.00 (0.17-5.77)                                  | 1.44 (0.39-5.32)                                         |
| IGFBP3             | 1.00 (0.85-1.18)                                 | 0.11 (0.04-0.32)                                        | 1.00 (0.31-3.20)                                  | 0.65 (0.22-1.91)                                         |
| IGFBP5             | 1.00 (0.55-1.81)                                 | 0.04 (0.02-0.07)                                        | 1.00 (0.31-3.23)                                  | 0.05 (0.01-0.40)                                         |
| IGFBP7             | 1.00 (0.47-2.15)                                 | 1.03 (0.49-2.17)                                        | 1.00 (0.58-1.74)                                  | 0.94 (0.42-2.07)                                         |
| IL13Ra1            | 1.00 (0.84-1.20)                                 | 0.33 (0.21-0.51)                                        | 1.00 (0.73-1.36)                                  | 0.95 (0.48-1.90)                                         |
| IL13Ra2            | 1.00 (0.51-1.97)                                 | 0.43 (0.27-0.68)                                        | 1.00 (0.68-1.48)                                  | ND                                                       |
| IL8                | 1.00 (0.35-2.85)                                 | 0.44 (0.23-0.84)                                        | 1.00 (0.35-2.85)                                  | 10.00 (1.48-67.78)                                       |
| JAG1               | 1.00 (0.51-1.95)                                 | 1.97 (1.09-3.56)                                        | 1.00 (0.46-2.15)                                  | 1.96 (0.82-4.71)                                         |
| MEST               | 1.00 (0.47-2.13)                                 | 1.41 (0.62-3.23)                                        | 1.00 (0.37-2.69)                                  | 0.05 (0.02-0.11)                                         |
| MMP1               | 1.00 (0.77-1.30)                                 | 0.06 (0.02-0.20)                                        | 1.00 (0.12-8.13)                                  | 0.12 (0.02-0.63)                                         |
| MMP3               | 1.00 (0.22-4.58)                                 | 0.09 (0.05-0.16)                                        | 1.00 (0.10-10.11)                                 | 0.32 (0.11-0.89)                                         |
| SFRP1              | 1.00 (0.11-9.31)                                 | 0.43 (0.23-0.82)                                        | 1.00 (0.84-1.19)                                  | 2.28 (1.15- 4.51)                                        |
| SFRP2              | 1.00 (0.28-3.56)                                 | 0.89 (0.29-2.77)                                        | 1.00 (0.19-5.16)                                  | 0.40 (0.09-1.80)                                         |
| TGFBR1             | 1.00 (0.46-2.16)                                 | 0.22 (0.37-2.02)                                        | 1.00 (0.52-1.91)                                  | 0.40 (0.29-0.55)                                         |
| TGFBR2             | 1.00 (0.32-3.14)                                 | 1.46 (0.83-2.55)                                        | 1.00 (0.56-1.79)                                  | 1.81 (0.82-3.97)                                         |
| TGFBR3             | 1.00 (0.76-1.32)                                 | 3.86 (1.94-7.71)                                        | 1.00 (0.41-2.44)                                  | 0.94 (0.39-2.30)                                         |
